# Supplementary material for: Targeting Tumor Hypoxia Using Nanoparticle-engineered CXCR4-overexpressing Adipose-derived Stem Cells
Source: PubMed Central journal article supplement — Theranostics. 2018 Feb 2;8(5):1350–60. doi: 10.7150/thno.22736 (PMC5835941; doi:10.7150/thno.22736), 2018-02-02
Supplement: thnov08p1350s1.pdf [file thnov08p1350s1.pdf]

## Supplementary information

**Table S1. Physicochemical characterization of PBAE/pDNA NPs suspended in deionized water or full-component culture medium (n = 3).**

| Entry      | Medium              | Z-average(nm) | PDI        | ζpotential(mV) |
|------------|---------------------|---------------|------------|----------------|
| NPs/pCXCR4 | DI H <sub>2</sub> O | 179.7±0.32    | 0.142±0.04 | 43.22±2.33     |
|            | ADSCs medium        | 207.7±0.75    | 0.149±0.01 | -7.55±1.36     |
| NPs/pEGFP  | DI H <sub>2</sub> O | 183.5±0.34    | 0.136±0.03 | 42.84±1.24     |
|            | ADSCs medium        | 206.1±2.31    | 0.281±0.01 | -8.77 ± 0.41   |

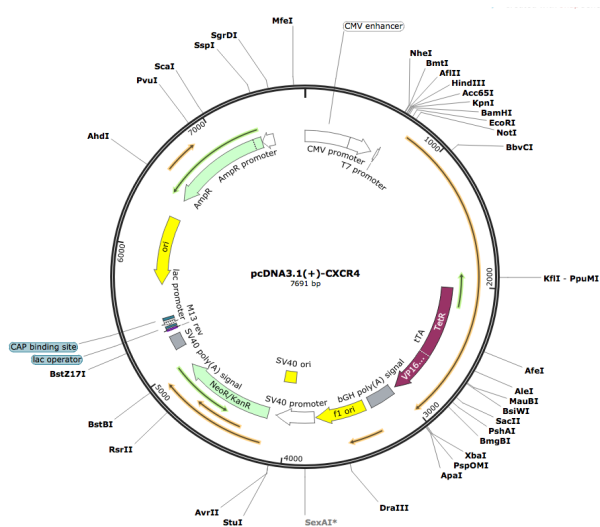

**Figure S1. Map of pcDNA3.1(+)-CXCR4**

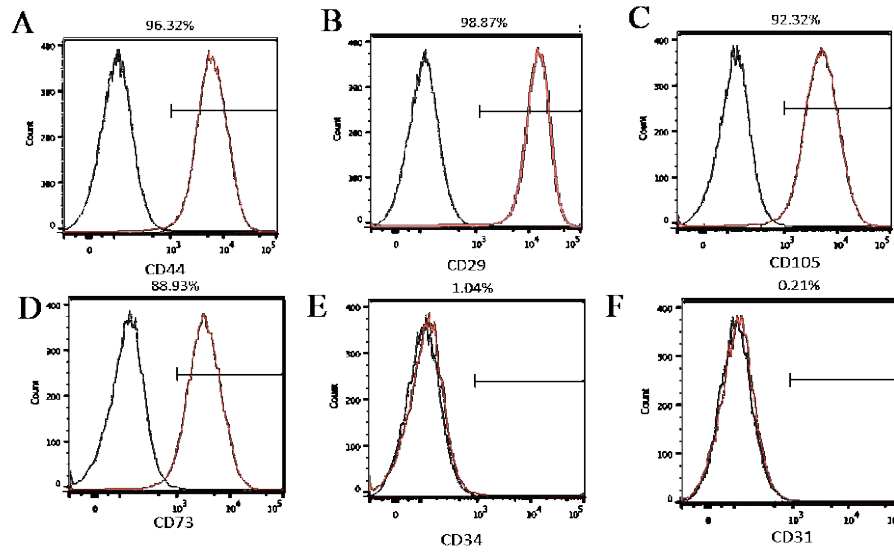

**Figure.S2.** Flow cytometry analyses indicates hADSCs at passage 3 were positive for CD44 (A), CD29 (B), CD105 (C), and CD73 (D), and negative for CD34 (E) and CD31 (F).  $2 \times 10^6$  events were acquired and the frequency of positive cells was determined using FlowJo.

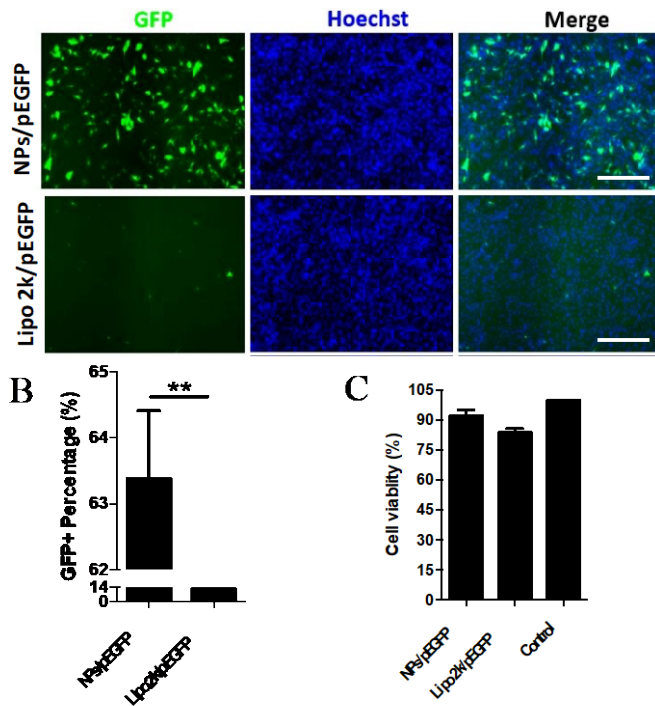

**Figure S3. (A) Transfection efficiency visualized using fluorescence microscopy.** In vitro transfection efficiency with PBAE NPs or a leading commercially available transfection agent (Lipofectamine 2000; Lipo 2k). EGFP was used as a reporter to optimize the transfection formulation, and pcDNA was used as a vector control. Optimal PBAE/pEGFP NPs led to higher transfection efficiency than achieved with Lipo 2k. No fluorescence was detected in pcDNA-treated hADSCs. Scale bars = 200 μm. **(B)** Flow cytometry of hADSCs 48 h after transfection with pEGFP mediated by PBAE NPs or Lipo 2k. hADSCs treated with 20:1 PBAE:pEGFP consistently demonstrated ~5.4-fold higher transfection efficiency than cells transfected with Lipo 2k. \*\* $p < 0.01$ . **(C)** Cell viability was analyzed via the MTS assay 48 h after transfection with NPs/pEGFP or Lipo 2k/pEGFP. hADSCs transfected with NPs/pEGFP exhibited no significant change in viability compared with naïve controls. The viability of untransfected, unmanipulated parallel cultures of hADSCs was defined as 100% viability.

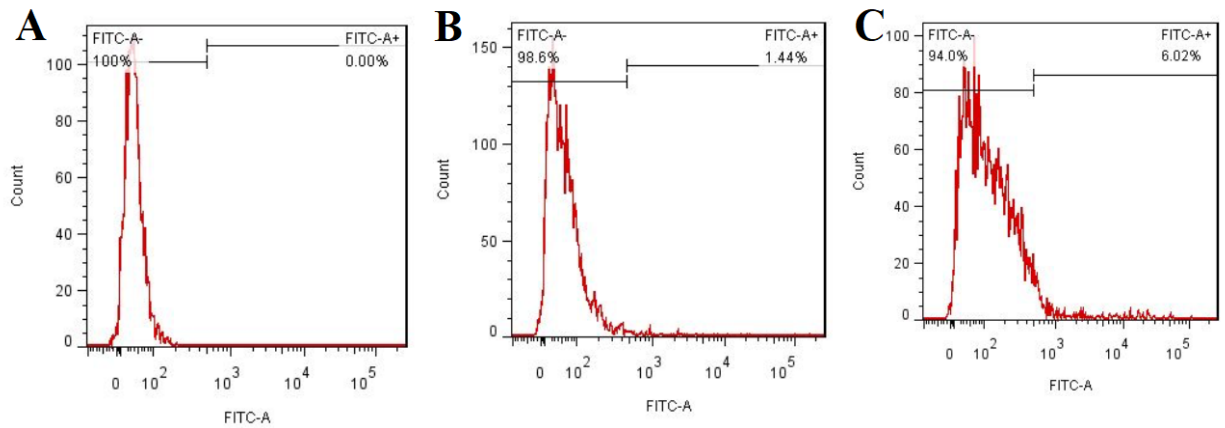

**Figure S4.** CXCR4<sup>+</sup> hADSCs (passae 3) determined using Flow Cytometry (without permeabilization 48h after NPs-mediated transfection. (A) Non-treated hADSCs (no transfection and no immunostaining); (B) untransfected hADSCs without immunostaining; (C) Transfected hADSCs with immunostaining.

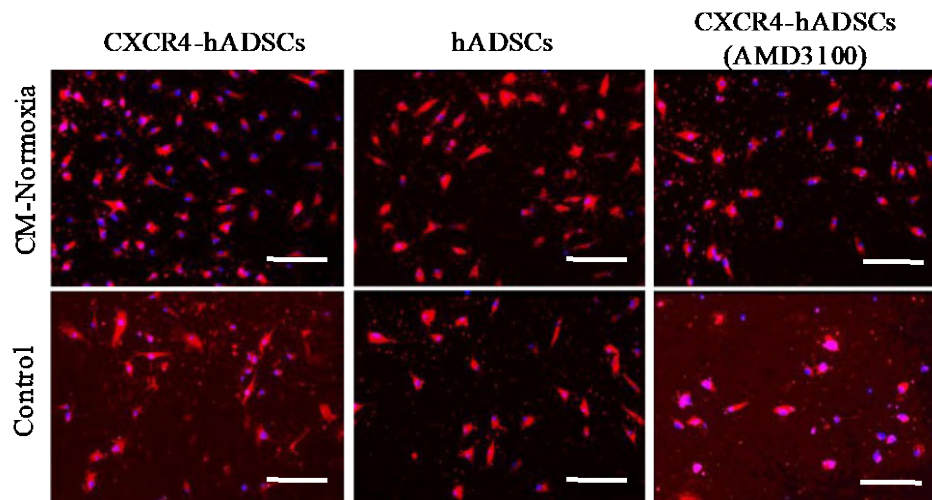

**Figure S5.** More hADSCs migrate toward conditioned medium in which the malignant GBM cell line U87MG was cultured under normoxic conditions (O<sub>2</sub>, 20%) than toward fresh Dulbecco's Modified Eagle Medium (control). CXCR4 overexpression further enhanced this migration. Pre-incubation with the CXCR4 antagonist AMD3100 did not affect the migration of naïve hADSCs toward conditioned medium. Cell membranes were stained red with the fluorescent dye PKH26; nuclei were labeled blue with Hoechst 33342. Scale bar = 200  $\mu$ m.

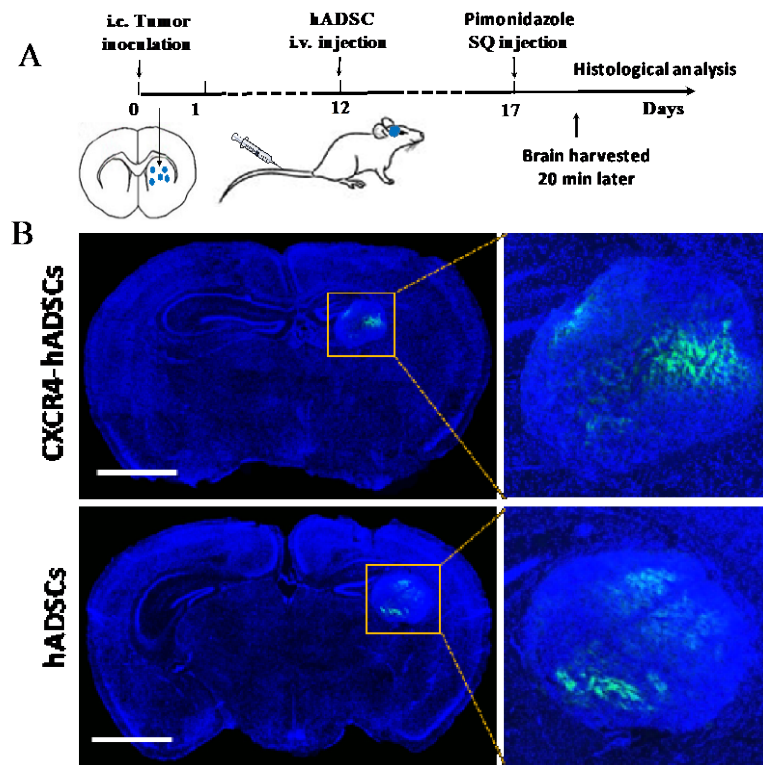

**Figure S6. hADSCs did not migrate towards tumor tissues 5 days after injection into the tail veins of mice with brain glioma. (A) Schematic of experimental design. i.c., intracranial; i.v., intravenous; SQ, subcutaneous. (B) Representative sections of the tropism of CXCR4-overexpressing hADSCs and naïve hADSCs toward malignant cells in the brain tissue of a xenograft mouse model 5 days after intravenous injection.**
